# Supplementary material for: Impact of mineral dust on shortwave and longwave radiation: evaluation of different vertically resolved parameterizations in 1-D radiative transfer computations
Source: Copernicus journal article supplement (doi:10.5194/acp-19-523-2019), 2019-01-14
Supplement: Supplementary file 1 [file acp-19-523-2019-supplement.pdf]

Supplement of Atmos. Chem. Phys., 19, 523–542, 2019  
<https://doi.org/10.5194/acp-19-523-2019-supplement>  
© Author(s) 2019. This work is distributed under  
the Creative Commons Attribution 4.0 License.

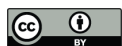

*Supplement of*

## **Impact of mineral dust on shortwave and longwave radiation: evaluation of different vertically resolved parameterizations in 1-D radiative transfer computations**

**María José Granados-Muñoz et al.**

*Correspondence to:* María José Granados-Muñoz ([maria.jose.granados@tsc.upc.edu](mailto:maria.jose.granados@tsc.upc.edu))

The copyright of individual parts of the supplement might differ from the CC BY 4.0 License.

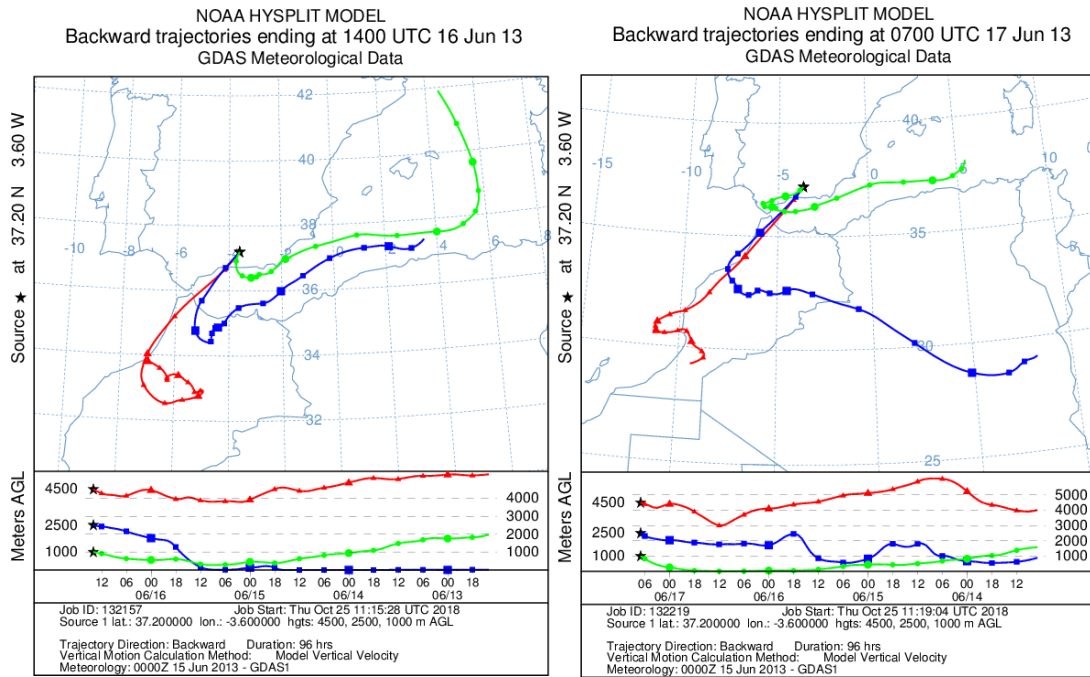

Fig S1. 4-day backward air mass trajectories arriving at Granada station on June 16 (left) and June 17 (right), 2013, obtained with HYSPLIT model from GDAS meteorological data.
